# Supplementary material for: Models of Care in Geriatric Intensive Care—A Scoping Review on the Optimal Structure of Care for Critically Ill Older Adults Admitted in an ICU
Source: PubMed Central journal article supplement — Crit Care Explor. 2022 Mar 31;4(4):e0661. doi: 10.1097/CCE.0000000000000661 (PMC8974598; doi:10.1097/cce.0000000000000661), 2022-03-31
Supplement: cc9-4-e0661-s001.pdf [file cc9-4-e0661-s001.pdf]

## Search Method

### Cochrane search methods section key elements for article:

List of all databases searched (REVIEW ABSTRACT)

| Database (Host) | Medline (PubMed)         | Embase (Ovid)            | Cinahl (EbscoHost)       | Web of Sciences Core Collection (Clarivate) |
|-----------------|--------------------------|--------------------------|--------------------------|---------------------------------------------|
| Date search run | 2019-08-28<br>2020-05-21 | 2019-08-28<br>2020-05-21 | 2019-08-28<br>2020-05-21 | 2019-07-29<br>2020-05-21                    |
| Years covered   | Inception to present     | 1974 to present          | 1981 to present          | 1945 to present (various starting dates)    |

Date search was run (REVIEW ABSTRACT)

- Initial search was run 2019-08-28, updated 2020-05-21

Complete search strategy

- PubMed strategy

One or two sentence summary of the search strategy

- Organization or management of geriatric intensive care

Language restrictions (REVIEW ABSTRACT)

- None

List of individuals or organizations contacted (REVIEW ABSTRACT)

- None

List grey literature sources

- Google and Google Scholar: Canadian, American and European Geriatric Societies; Critical Care Associations

List any journals or conference proceedings hand searched for the review

- Canadian, American and European Geriatric Societies; Critical Care Associations

List any other sources searched

- none

## Medline (PubMed )

From inception to 2019-08-28 = 1088

from 2019-08-01 to 2020-05-21 = 180

("geriatric intensive care"[tiab] AND medline[*sb*])

OR

(geriatrics[MH] OR geriatricians[MH] OR "geriatric assessment"[MH])

AND

("intensive care units"[MH:Noexp] OR "critical illness"[MH:Noexp] OR "critical care"[MH] OR "critical care outcomes"[MH] OR traumatology[MH] OR "Trauma Centers"[MH])

AND

("organization and administration"[*sh*] OR standards[*sh*] OR trends[*sh*] OR "delivery of health care"[MH] OR "guidelines as topic"[MH] OR "outcome and process assessment, health care"[MH] OR "treatment outcome"[MH] OR "patient care"[MH] OR "patient care management"[MH:Noexp] OR "patient care team"[MH:Noexp] OR "nursing, team"[MH] OR "advance care planning"[MH:Noexp] OR "hospital mortality"[MH] OR "health status"[MH] OR prognosis[MH] OR "survival analysis"[MH] OR "surveys and questionnaires"[MH] OR "prospective studies"[MH] OR "attitude of health personnel"[MH] OR "Health Impact Assessment"[MH] OR "Organization and Administration"[MH] OR "models, organizational"[MH] OR "health facility administration"[MH] OR "organizational innovation"[MH] OR "program development"[MH])

OR

("geriatric intensive care"[tiab] OR geriatric\*[tiab])

AND

(ICU\*[tiab] OR "step down"[tiab] OR critical[tiab] OR trauma\*[tiab] OR "intensive care"[tiab])

AND

(guideline[tiab] OR guidelines[tiab] OR organization[tiab] OR organizational[tiab] OR organisation[tiab] OR organisational[tiab] OR administration[tiab] OR model[tiab] OR models[tiab] OR "patient care"[tiab])

## **Methods**

### **Literature search**

This scoping review was performed according to the Preferred Reporting Items for Systematic Reviews and Meta-Analyses (PRISMA) guidelines. This study was not registered at the time the searches were executed. It has since been registered at OSF Registries, the Open Science Framework, on 2020-05-09.

Medline (via PubMed), Embase (OvidSP), Cinahl (Ebsco) and Web of Science (Clarivate) were all searched on 28 August 2019 (July 29<sup>th</sup>, 2019 for Web of Science). The strategy goal was to find. No language restriction was used. The search strategy was devised and executed by a librarian (RC) and peer reviewed.

The comprehensive search strategy used a combination of keywords, MeSH terms and Entree descriptors. Index terms and text words used were “intensive care”, “critical care”, “critically ill” and “critical illness” (with plural variations and database specific adaptations), as well as the concepts for “systematic review” and “meta-analysis”. Terms used as well as full search strategies are provided in the Appendix Supplemental Material.

Records were imported in an EndNote library (EndNote X7). Duplicates were eliminated using the *Find duplicates* function in the bibliographic database manager. The setting used to match records was to compare “author”, “title” and “year”. Records were then exported from EndNote and imported into Rayyan, a free web-based application, where another set of duplicates was eliminated.

The search was re-run in May 21<sup>th</sup>, 2020 prior to final writing of this review and any relevant studies were included. Those studies did not change/change the conclusion of the review.

**Study identification**

Titles and abstracts were assessed for eligibility and the full text of potentially relevant articles were analyzed by the authors DB, TW, MFF and HTW using the web application Rayyan.

Reviewers selected or excluded the studies independently of each other, while any disagreement was resolved by discussion within the research team.

From the 3765 records screened, 3665 were excluded based on the title and the abstract. One hundred full-text articles were then assessed for eligibility. Nineteen studies were selected to be included in the qualitative synthesis. Twelve studies were considered for inclusion in the quantitative analysis.

## Search strategies

### Medline strategy (PubMed).

From inception to 2019-08-28 = 1088

from 2019-08-01 to 2020-05-21 = 180

("geriatric intensive care"[tiab] AND medline[sb])

OR

(geriatrics[MH] OR geriatricians[MH] OR "geriatric assessment"[MH])

AND

("intensive care units"[MH:Noexp] OR "critical illness"[MH:Noexp] OR "critical care"[MH]

OR "critical care outcomes"[MH] OR traumatology[MH] OR "Trauma Centers"[MH])

AND

("organization and administration"[sh] OR standards[sh] OR trends[sh] OR "delivery of health care"[MH] OR "guidelines as topic"[MH] OR "outcome and process assessment, health care"[MH] OR "treatment outcome"[MH] OR "patient care"[MH] OR "patient care management"[MH:Noexp] OR "patient care team"[MH:Noexp] OR "nursing, team"[MH] OR "advance care planning"[MH:Noexp] OR "hospital mortality"[MH] OR "health status"[MH] OR prognosis[MH] OR "survival analysis"[MH] OR "surveys and questionnaires"[MH] OR "prospective studies"[MH] OR "attitude of health personnel"[MH] OR "Health Impact Assessment"[MH] OR "Organization and Administration"[MH] OR "models, organizational"[MH] OR "health facility administration"[MH] OR "organizational innovation"[MH] OR "program development"[MH])

OR

("geriatric intensive care"[tiab] OR geriatric\*[tiab])

AND

(ICU\*[tiab] OR "step down"[tiab] OR critical[tiab] OR trauma\*[tiab] OR "intensive care"[tiab])

AND

(guideline[tiab] OR guidelines[tiab] OR organization[tiab] OR organizational[tiab] OR organisation[tiab] OR organisational[tiab] OR administration[tiab] OR model[tiab] OR models[tiab] OR "patient care"[tiab])

## Embase (Ovid)

1974 to 2019 August 27 (2019-08-28) = 1050

2019-08-01 to 2020 May 20 (2020-05-21) = 133

1. exp geriatrics/ or geriatrics.ti,ab,kw.
2. geriatric assessment/
3. geriatrician/ or geriatrician?.ti,ab,kw.
4. exp geriatric care/
5. geriatric patient/ or geriatric.ti,ab,kw.
6. or/1-5
7. exp intensive care/ or intensive care unit/ or medical intensive care unit/ or ICU?.ti,ab,kw.
8. critical illness/ or critical.ti,ab,kw.
9. exp traumatology/ or trauma center?.ti,ab,kw. or traumatology.ti,ab,kw.
10. or/7-9
11. exp standard/ or standard?.ti,ab,kw. or trend?.ti,ab,kw.
12. exp health care delivery/
13. exp practice guideline/ or guideline?.ti,ab,kw.
14. exp treatment outcome/ or outcome assessment/
15. hospital mortality/ or survival analysis/
16. prognosis/
17. exp patient care/ or patient care.ti,ab,kw. or team nursing/ or nursing team.ti,ab,kw.
18. exp health status/
19. health care survey/ or survey?.ti,ab,kw.
20. exp questionnaire/
21. prospective study/
22. exp health personnel attitude/
23. health impact assessment/
24. exp "organization and management"/ or advance care planning/
25. exp organization/ or health care facility/
26. exp planning/ or program development/
27. (organizational or organisational).ti,ab,kw.
28. (organizational model? or organizational innovation?).ti,ab,kw.
29. or/11-28
30. "geriatric intensive care".ti,ab,kw.
31. 6 and 10 and 29
32. 30 or 31
33. limit 32 to exclude medline journals
34. remove duplicates from 32

**Cinahl** (Ebsco)

2019-08-29 = 179

2019-08-01 to 2020-05-21 = 25

"geriatric intensive care"

OR

(

(MH "geriatrics" OR

MH "Geriatric Assessment+" OR

MH "Gerontologic Care" OR

MH "Geriatricians")

AND

(MH "Intensive Care Units+" OR

MH "Critically Ill Patients" OR

MH "Critical Illness" OR

MH "Traumatology")

AND

(MH "Health Care Delivery" OR

MH "Health Care Delivery, Integrated" OR

MH "Practice Guidelines" OR

MH "Quality of Health Care" OR

MH "Outcome Assessment" OR

MH "Outcomes (Health Care)" OR

MH "Treatment Outcomes+" OR

MH "hospital mortality" OR

MH "Health Status+" OR

MH "Prognosis" OR

MH "survival analysis" OR

MH "Multidisciplinary Care Team+" OR

MH "Patient Care+" OR

MH "Health Facility Administration" OR

MH "Health Facility Planning+" OR

MH "Surveys+" OR

MH "Questionnaires+" OR

MH "Prospective Studies+" OR

MH "Attitude of Health Personnel+" OR

MH "Health Impact Assessment" OR

MH "Management" OR

MH "Decision Support Techniques+" OR

MH "Program Development+")

)

## Web of Science Core Collection: Citation Indexes (Clarivate)

Science Citation Index Expanded (SCI-EXPANDED) --1945-present  
Social Sciences Citation Index (SSCI) --1956-present  
Arts & Humanities Citation Index (A&HCI) --1975-present  
Conference Proceedings Citation Index- Science (CPCI-S) --1990-present  
Conference Proceedings Citation Index- Social Science & Humanities (CPCI-SSH) --1990-present  
Emerging Sources Citation Index (ESCI) --2015-present

### Web of Science Core Collection

2019-07-29 = 108

2019-08-01 to 2020-05-21= 339 (2020-05-21)

# 1

55,459

TS=("geriatric intensive care" OR geriatric\*)

Indexes=SCI-EXPANDED, SSCI, A&HCI, CPCI-S, CPCI-SSH, ESCI Timespan=All years

# 2

544,998

TS=(ICU\* OR "step down" OR (critical\*NEAR/3 (ill\* OR care) ) OR trauma\* OR (intensive NEAR/2 care) )

Indexes=SCI-EXPANDED, SSCI, A&HCI, CPCI-S, CPCI-SSH, ESCI Timespan=All years

# 3

14,977,973

TS=(standards OR trends OR ((healthcare OR "health care") NEAR/2 delivery) OR guideline\* OR outcome\* OR "patient care" OR "advance\* care plan\*" OR "hospital mortality" OR "health status" OR prognosis OR "survival analysis" OR survey\* OR questionnaire\* OR "prospective stud\*" OR (attitude\* NEAR/2 "health personnel") OR (impact NEAR/2 assess\*) OR (health NEAR/2 administration) OR organisation\* OR organization\* OR (program\* NEAR/2 develop\*) OR model\*)

Indexes=SCI-EXPANDED, SSCI, A&HCI, CPCI-S, CPCI-SSH, ESCI Timespan=All years

# 4

1,936

#3 AND #2 AND #1

Indexes=SCI-EXPANDED, SSCI, A&HCI, CPCI-S, CPCI-SSH, ESCI Timespan=All years

# 5

339

#3 AND #2 AND #1

Refined by: PUBLICATION YEARS: ( 2020 OR 2019 )

Indexes=SCI-EXPANDED, SSCI, A&HCI, CPCI-S, CPCI-SSH, ESCI Timespan=All years

**EMBASE strategy (Ovid). Executed 2018-05-31 (2013 to 2018 Week 22)**



The search strategy used two different filters to find RCTs: Wong sensitivity maximizing filter (2006) and Lefebvre Cochrane RCT filter (2011).

Lefebvre C, Manheimer E, Glanville J. Chapter 6: Searching for studies. In: Higgins J, Green S (editors). Cochrane Handbook for Systematic Reviews of Interventions. Version 5.1.0 (updated March 2011). The Cochrane Collaboration, 2011. Available from [www.cochrane-handbook.org](http://www.cochrane-handbook.org)

Wong SS, Wilczynski NL, Haynes RB. Developing optimal search strategies for detecting clinically sound treatment studies in EMBASE. J Med Libr Assoc. 2006 Jan;94(1):41-7.

From: <http://work.cochrane.org/embase>
